# Supplementary material for: MicroRNAs Associated with Chronic Kidney Disease in the General Population and High-Risk Subgroups—A Systematic Review
Source: MDPI journal article supplement (doi:10.3390/ijms24021792), 2023-01-16
Supplement: s1 [file s1]

## Supplementary data

**Supplementary Table S1 Medline (PubMed) search strategy (from inception to 30 September 2022)**

| Search | Query                                                                                                                                                                                                                                                                                                                                                                                                     | Number of hits |
|--------|-----------------------------------------------------------------------------------------------------------------------------------------------------------------------------------------------------------------------------------------------------------------------------------------------------------------------------------------------------------------------------------------------------------|----------------|
| #1     | (Chronic kidney disease) OR (chronic kidney failure) OR (chronic renal disease) OR (chronic renal failure) OR (end-stage renal disease) OR (end-stage renal failure) OR (diabetic kidney disease) OR (diabetic nephropathy) OR (hypertensive nephrosclerosis) OR albuminuria OR proteinuria OR (HIV associated nephropathy) OR HIVAN OR (HIV-associated kidney disease) OR (HIV-associated renal disease) | 277,388        |
| #2     | (Serum creatinine) OR (serum cystatin C) OR (estimated glomerular filtration rate) OR (urinary albumin excretion rate) OR (albumin-to-creatinine ratio) OR (urinary albumin)                                                                                                                                                                                                                              | 95,064         |
| #3     | microRNAs OR miRNA OR miRNAs                                                                                                                                                                                                                                                                                                                                                                              | 133,454        |
| #4     | animal OR rat OR mouse OR (cell-line)                                                                                                                                                                                                                                                                                                                                                                     | 7,721,509      |
| #5     | cancer OR (acute kidney injury)                                                                                                                                                                                                                                                                                                                                                                           | 4,215,872      |
| #6     | #1 OR #2                                                                                                                                                                                                                                                                                                                                                                                                  | 333,540        |
| #7     | #6 AND #3                                                                                                                                                                                                                                                                                                                                                                                                 | 1,627          |
| #8     | #7 NOT #                                                                                                                                                                                                                                                                                                                                                                                                  | 683            |
| #9     | #8 NOT #5                                                                                                                                                                                                                                                                                                                                                                                                 | 577            |

**Supplementary Table S2 Web of science search strategy (from inception to 30 September 2022)**

| Search | Query                                                                  | Number of hits |
|--------|------------------------------------------------------------------------|----------------|
| #1     | (Chronic kidney disease) OR (chronic kidney failure) OR (chronic renal |                |

|    |                                                                                                                                                                                                                                                                                                                                                                                                                                                                                                                                                                                                                                            |           |
|----|--------------------------------------------------------------------------------------------------------------------------------------------------------------------------------------------------------------------------------------------------------------------------------------------------------------------------------------------------------------------------------------------------------------------------------------------------------------------------------------------------------------------------------------------------------------------------------------------------------------------------------------------|-----------|
|    | disease) OR (chronic renal failure) OR (end-stage renal disease) OR (end-stage renal failure) OR (diabetic kidney disease) OR (diabetic nephropathy) OR (hypertensive nephrosclerosis) OR albuminuria OR proteinuria OR (HIV associated nephropathy) OR HIVAN OR (HIV-associated kidney disease) OR (HIV-associated renal disease)                                                                                                                                                                                                                                                                                                         | 244,799   |
| #2 | (Serum creatinine) OR (serum cystatin C) OR (estimated glomerular filtration rate) OR (urinary albumin excretion) OR (albumin-to-creatinine ratio) OR (urinary albumin)                                                                                                                                                                                                                                                                                                                                                                                                                                                                    | 87,982    |
| #3 | microRNAs OR miRNA OR miRNAs                                                                                                                                                                                                                                                                                                                                                                                                                                                                                                                                                                                                               | 117,582   |
| #4 | animal OR rat OR mouse OR (cell-line)                                                                                                                                                                                                                                                                                                                                                                                                                                                                                                                                                                                                      | 4,402,334 |
| #5 | cancer OR (acute kidney injury)                                                                                                                                                                                                                                                                                                                                                                                                                                                                                                                                                                                                            | 3,752,456 |
| #6 | (ALL= ((Chronic kidney disease) OR (chronic kidney failure) OR (chronic renal disease) OR (chronic renal failure) OR (end-stage renal disease) OR (end-stage renal failure) OR (diabetic kidney disease) OR (diabetic nephropathy) OR (hypertensive nephrosclerosis) OR albuminuria OR proteinuria OR (HIV associated nephropathy) OR HIVAN OR (HIV-associated kidney disease) OR (HIV-associated renal disease)) OR ALL= ((Serum creatinine) OR (serum cystatin C) OR (estimated glomerular filtration rate) OR (urinary albumin excretion) OR (albumin-to-creatinine ratio) OR (urinary albumin))                                        | 296,928   |
| #7 | ((ALL=((Chronic kidney disease) OR (chronic kidney failure) OR (chronic renal disease) OR (chronic renal failure) OR (end-stage renal disease) OR (end-stage renal failure) OR (diabetic kidney disease) OR (diabetic nephropathy) OR (hypertensive nephrosclerosis) OR albuminuria OR proteinuria OR (HIV associated nephropathy) OR HIVAN OR (HIV-associated kidney disease) OR (HIV-associated renal disease)) OR ALL=((Serum creatinine) OR (serum cystatin C) OR (estimated glomerular filtration rate) OR (urinary albumin excretion) OR (albumin-to-creatinine ratio) OR (urinary albumin)) AND ALL=( microRNAs OR miRNA OR miRNAs) | 1,554     |
| #8 | ((((ALL=((Chronic kidney disease) OR (chronic kidney failure) OR (chronic renal disease) OR (chronic renal failure) OR (end-stage renal disease) OR                                                                                                                                                                                                                                                                                                                                                                                                                                                                                        | 913       |

|    |                                                                                                                                                                                                                                                                                                                                                                                                                                                                                                                                                                                                                                                                                                                                                 |     |
|----|-------------------------------------------------------------------------------------------------------------------------------------------------------------------------------------------------------------------------------------------------------------------------------------------------------------------------------------------------------------------------------------------------------------------------------------------------------------------------------------------------------------------------------------------------------------------------------------------------------------------------------------------------------------------------------------------------------------------------------------------------|-----|
|    | (end-stage renal failure) OR (diabetic kidney disease) OR (diabetic nephropathy) OR (hypertensive nephrosclerosis) OR albuminuria OR proteinuria OR (HIV associated nephropathy) OR HIVAN OR (HIV-associated kidney disease) OR (HIV-associated renal disease)) OR ALL=((Serum creatinine) OR (serum cystatin C) OR (estimated glomerular filtration rate) OR (urinary albumin excretion) OR (albumin-to-creatinine ratio) OR (urinary albumin)) AND ALL=(microRNAs OR miRNA OR miRNAs)) NOT ALL=(animal OR rat OR mouse OR (cell-line))                                                                                                                                                                                                        |     |
| #9 | (((ALL=((Chronic kidney disease) OR (chronic kidney failure) OR (chronic renal disease) OR (chronic renal failure) OR (end-stage renal disease) OR (end-stage renal failure) OR (diabetic kidney disease) OR (diabetic nephropathy) OR (hypertensive nephrosclerosis) OR albuminuria OR proteinuria OR (HIV associated nephropathy) OR HIVAN OR (HIV-associated kidney disease) OR (HIV-associated renal disease)) OR ALL=((Serum creatinine) OR (serum cystatin C) OR (estimated glomerular filtration rate) OR (urinary albumin excretion rate) ) OR (albumin-to-creatinine ratio) OR (urinary albumin)) AND ALL=( microRNAs OR miRNA OR miRNAs)) NOT ALL=(animal OR rat OR mouse OR (cell-line))) NOT ALL=(cancer OR (acute kidney injury) ) | 669 |

**Supplementary Table S3 Scopus search strategy (from inception to 30 September 2022)**

| Search | Query                                                                                                                                                                                                                                                                                                                                                                                                     | Number of hits |
|--------|-----------------------------------------------------------------------------------------------------------------------------------------------------------------------------------------------------------------------------------------------------------------------------------------------------------------------------------------------------------------------------------------------------------|----------------|
| #1     | "Chronic kidney disease" OR "chronic kidney failure" OR "chronic renal disease" OR "chronic renal failure" OR "end-stage renal disease" OR "end-stage renal failure" OR "diabetic kidney disease" OR "diabetic nephropathy" OR "hypertensive nephrosclerosis" OR albuminuria OR proteinuria OR “HIV associated nephropathy” OR HIVAN OR “HIV-associated kidney disease” OR “HIV-associated renal disease” | 626,284        |
| #2     | "Serum creatinine" OR "serum cystatin C" OR "estimated glomerular filtration rate" OR "urinary albumin excretion rate" OR "albumin-to-creatinine ratio" OR "urinary albumin"                                                                                                                                                                                                                              | 139,458        |
| #3     | microRNAs OR miRNA OR miRNAs                                                                                                                                                                                                                                                                                                                                                                              | 309,549        |
| #4     | animal OR rat OR mouse OR "cell-line"                                                                                                                                                                                                                                                                                                                                                                     |                |

|    |                                                                                                                                                                                                                                                                                                                                                                                                                                                                                                                                                                                                                                                                                             |            |
|----|---------------------------------------------------------------------------------------------------------------------------------------------------------------------------------------------------------------------------------------------------------------------------------------------------------------------------------------------------------------------------------------------------------------------------------------------------------------------------------------------------------------------------------------------------------------------------------------------------------------------------------------------------------------------------------------------|------------|
|    |                                                                                                                                                                                                                                                                                                                                                                                                                                                                                                                                                                                                                                                                                             | 13,190,253 |
| #5 | cancer OR "acute kidney injury"                                                                                                                                                                                                                                                                                                                                                                                                                                                                                                                                                                                                                                                             | 7,436,396  |
| #6 | ("Chronic kidney disease" OR "chronic kidney failure" OR "chronic renal disease" OR "chronic renal failure" OR "end-stage renal disease" OR "end-stage renal failure" OR "diabetic kidney disease" OR "diabetic nephropathy" OR "hypertensive nephrosclerosis" OR albuminuria OR proteinuria OR "HIV associated nephropathy" OR HIVAN OR "HIV-associated kidney disease" OR "HIV-associated renal disease" ) OR ( "Serum creatinine" OR "serum cystatin C" OR "estimated glomerular filtration rate" OR "urinary albumin excretion rate" OR "albumin-to-creatinine ratio" OR "urinary albumin")                                                                                             | 682,499    |
| #7 | (( "Chronic kidney disease" OR "chronic kidney failure" OR "chronic renal disease" OR "chronic renal failure" OR "end-stage renal disease" OR "end-stage renal failure" OR "diabetic kidney disease" OR "diabetic nephropathy" OR "hypertensive nephrosclerosis" OR albuminuria OR proteinuria OR "HIV associated nephropathy" OR HIVAN OR "HIV-associated kidney disease" OR "HIV-associated renal disease") OR ( "Serum creatinine" OR "serum cystatin C" OR "estimated glomerular filtration rate" OR "urinary albumin excretion rate" OR "albumin-to-creatinine ratio" OR "urinary albumin" )) AND ( microRNAs OR miRNA OR miRNAs)                                                      | 13,330     |
| #8 | (( ( "Chronic kidney disease" OR "chronic kidney failure" OR "chronic renal disease" OR "chronic renal failure" OR "end-stage renal disease" OR "end-stage renal failure" OR "diabetic kidney disease" OR "diabetic nephropathy" OR "hypertensive nephrosclerosis" OR albuminuria OR proteinuria OR "HIV associated nephropathy" OR HIVAN OR "HIV-associated kidney disease" OR "HIV-associated renal disease" ) OR ( "Serum creatinine" OR "serum cystatin C" OR "estimated glomerular filtration rate" OR "urinary albumin excretion rate" OR "albumin-to-creatinine ratio" OR "urinary albumin" )) AND (microRNAs OR miRNA OR miRNAs)) AND NOT ( animal OR rat OR mouse OR "cell-line" ) | 1,505      |
| #9 | (( ( ( "Chronic kidney disease" OR "chronic kidney failure" OR "chronic renal disease" OR "chronic renal failure" OR "end-stage renal disease" OR "end-stage renal failure" OR "diabetic kidney                                                                                                                                                                                                                                                                                                                                                                                                                                                                                             | 568        |

|  |                                                                                                                                                                                                                                                                                                                                                                                                                                                                                                                                             |  |
|--|---------------------------------------------------------------------------------------------------------------------------------------------------------------------------------------------------------------------------------------------------------------------------------------------------------------------------------------------------------------------------------------------------------------------------------------------------------------------------------------------------------------------------------------------|--|
|  | disease" OR "diabetic nephropathy" OR "hypertensive nephrosclerosis" OR albuminuria OR proteinuria OR “HIV associated nephropathy” OR HIVAN OR “HIV-associated kidney disease” OR “HIV-associated renal disease”) OR ( "Serum creatinine" OR "serum cystatin C" OR "estimated glomerular filtration rate" OR "urinary albumin excretion rate" OR "albumin-to-creatinine ratio" OR "urinary albumin") ) AND (microRNAs OR miRNA OR miRNAs) ) AND NOT ( animal OR rat OR mouse OR "cell-line" ) ) AND NOT ( cancer OR "acute kidney injury" ) |  |
|--|---------------------------------------------------------------------------------------------------------------------------------------------------------------------------------------------------------------------------------------------------------------------------------------------------------------------------------------------------------------------------------------------------------------------------------------------------------------------------------------------------------------------------------------------|--|

***Supplementary Table S4 EBSCOhost search strategy (from inception to 30 September 2022)***

| Search | Query                                                                                                                                                                                                                                                                                                                                                                                                     | Number of hits |
|--------|-----------------------------------------------------------------------------------------------------------------------------------------------------------------------------------------------------------------------------------------------------------------------------------------------------------------------------------------------------------------------------------------------------------|----------------|
| #1     | (Chronic kidney disease) OR (chronic kidney failure) OR (chronic renal disease) OR (chronic renal failure) OR (end-stage renal disease) OR (end-stage renal failure) OR (diabetic kidney disease) OR (diabetic nephropathy) OR (hypertensive nephrosclerosis) OR albuminuria OR proteinuria OR (HIV associated nephropathy) OR HIVAN OR (HIV-associated kidney disease) OR (HIV-associated renal disease) | 430,313        |
| #2     | (Serum creatinine) OR (serum cystatin C) OR (estimated glomerular filtration rate) OR (urinary albumin excretion rate) OR (albumin-to-creatinine ratio) OR (urinary albumin)                                                                                                                                                                                                                              | 127,450        |
| #3     | microRNAs OR miRNA OR miRNAs                                                                                                                                                                                                                                                                                                                                                                              | 219,791        |
| #4     | animal OR rat OR mouse OR (cell-line)                                                                                                                                                                                                                                                                                                                                                                     | 11,974,642     |
| #5     | cancer OR (acute kidney injury)                                                                                                                                                                                                                                                                                                                                                                           | 5,633,922      |
| #6     | #1 OR #2                                                                                                                                                                                                                                                                                                                                                                                                  | 506,221        |
| #7     | #6 AND #3                                                                                                                                                                                                                                                                                                                                                                                                 | 2,460          |
| #8     | #7 NOT #4                                                                                                                                                                                                                                                                                                                                                                                                 | 1,205          |
| #9     | #8 NOT #5                                                                                                                                                                                                                                                                                                                                                                                                 |                |

|  |  |     |
|--|--|-----|
|  |  | 839 |
|--|--|-----|
